# Supplementary material for: An X-ray activatable gold nanorod encapsulated liposome delivery system for mitochondria-targeted photodynamic therapy (PDT)
Source: Royal Society of Chemistry journal article supplement (doi:10.1039/d3tb00608e), 2023-01-01
Supplement: d3tb00608e1.pdf [file d3tb00608e1.pdf]

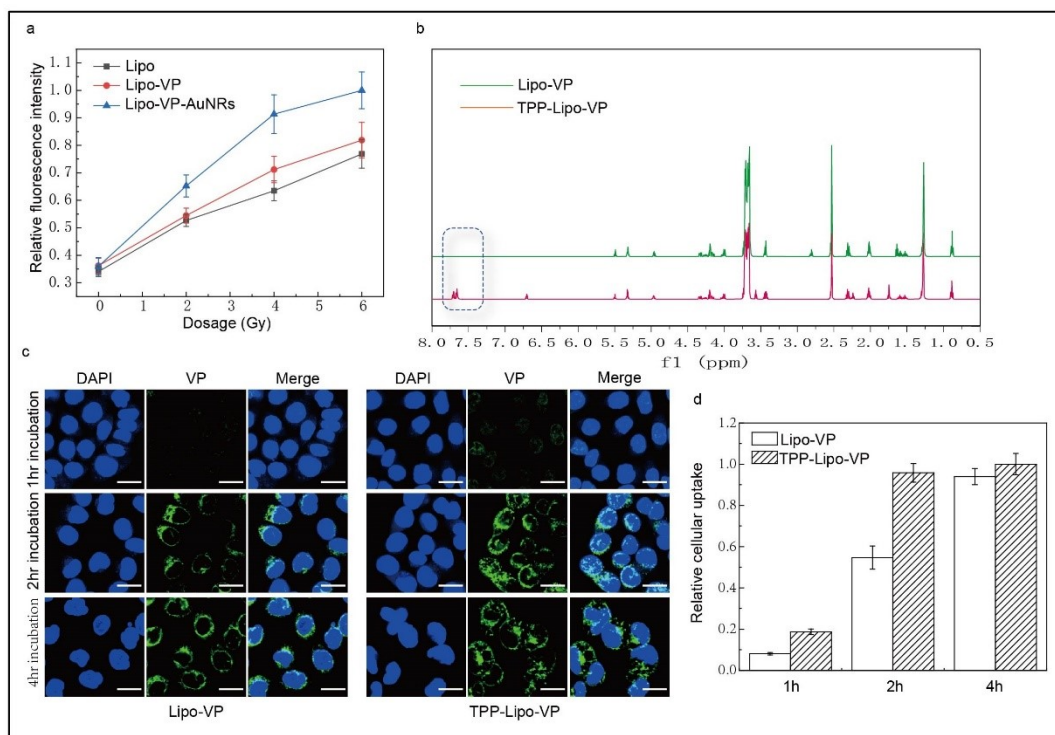

Supplementary Figure 1 (a) Relative SOSG fluorescence intensities from liposome samples at different X-ray doses. (b) <sup>1</sup>H NMR spectra of Lipo-VP and TPP-Lipo-VP. (c) Representative confocal laser scanning microscopy images of HCT 116 cells incubated with liposome samples for 1 h, 2 h and 4 h, respectively. Scale bar is 20 $\mu$ m. Quantitative analysis of VP fluorescence intensity ( $n=4$ )
